# Supplementary material
Source: Springer Nature journal article supplement (https://www.springermedizin.de/resource/supplementary/13075_2006_1952_MOESM11_ESM.pdf/9690958)

Figure 9: Massicotte et al

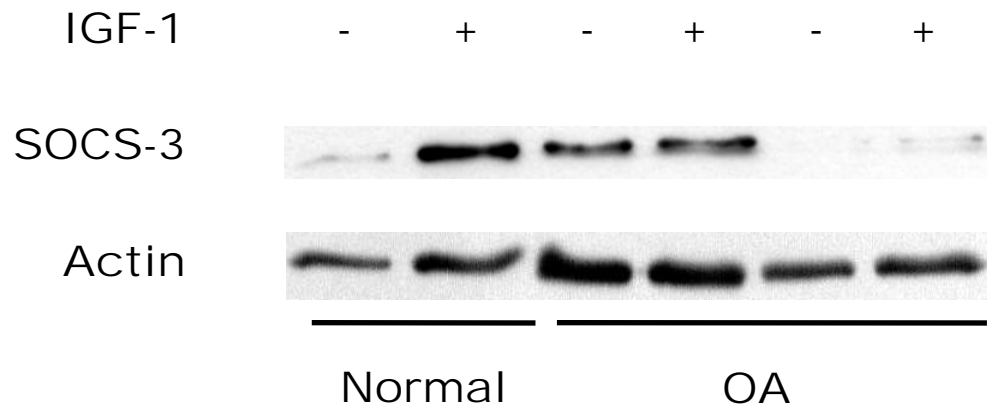

Supplement: MOESM11 [file 9690958]
